# Supplementary material for: Prevalence and clinical outcomes of COVID-19 in patients with autoimmune diseases: a systematic review and meta-analysis
Source: HighWire-hosted journal article supplement (doi:10.1136/annrheumdis-2020-218946), 2020-10-13

Figure S1. Funnel plots for meta-analysis regarding the prevalence of COVID-19 in patients with autoimmune diseases

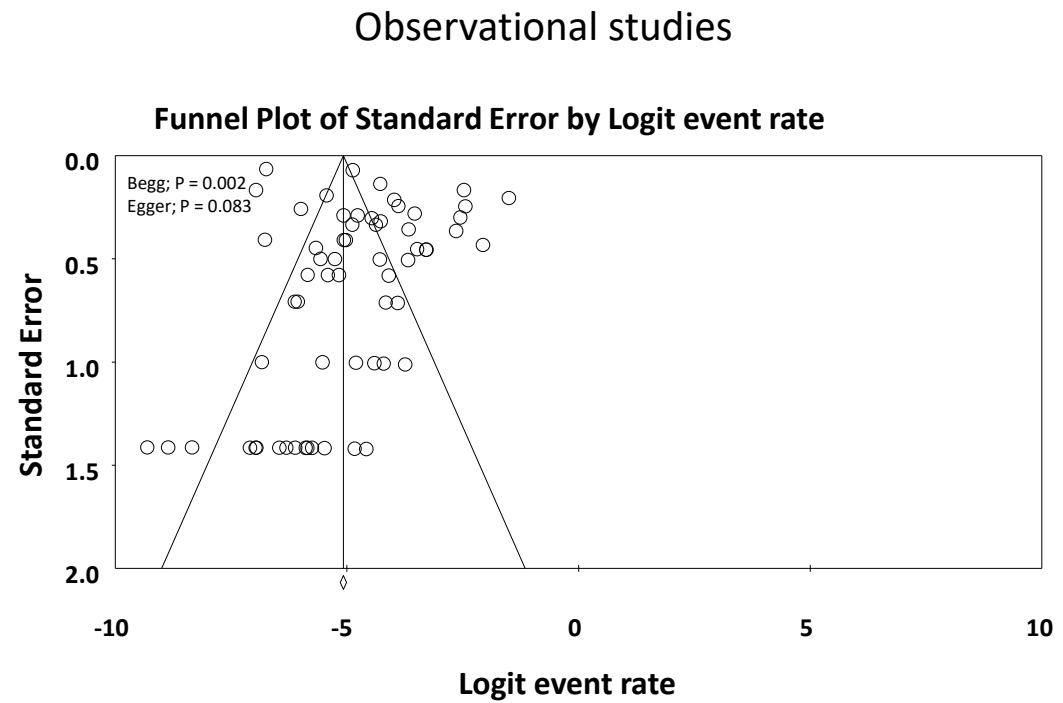

Figure S2. Meta-analysis regarding the prevalence of COVID-19 in patients with autoimmune diseases (by country)

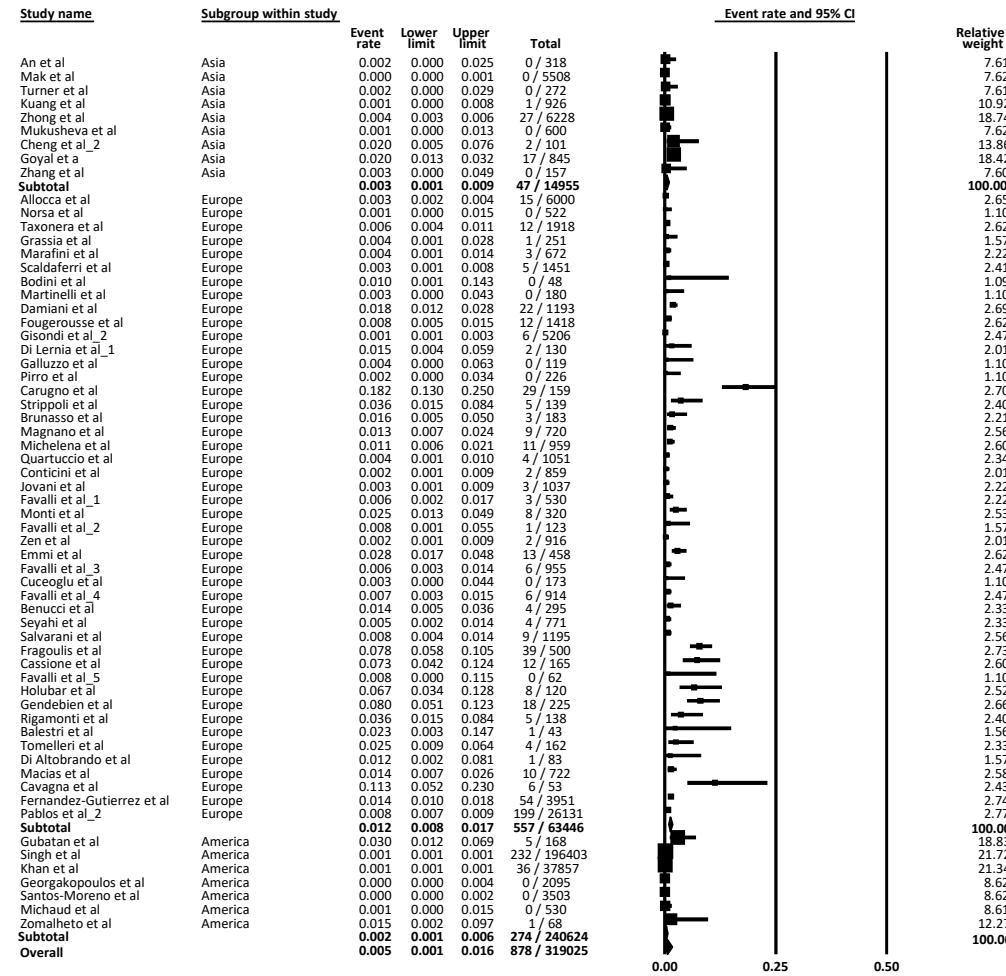

Asia;  $P < 0.001$ , Heterogeneity:  $I^2 = 82.2\%$ ,  $Q = 45.1$ ,  $P < 0.001$   
 Europe;  $P < 0.001$ , Heterogeneity:  $I^2 = 93.5\%$ ,  $Q = 687.3$ ,  $P < 0.001$   
 America;  $P < 0.001$ , Heterogeneity:  $I^2 = 90.4\%$ ,  $Q = 62.7$ ,  $P < 0.001$   
 Overall;  $P < 0.001$ , Heterogeneity:  $I^2 = 96.8\%$ ,  $Q = 1888.7$ ,  $P < 0.001$

Figure S3. Funnel plots for meta-analysis regarding the prevalence of COVID-19 in patients with autoimmune diseases

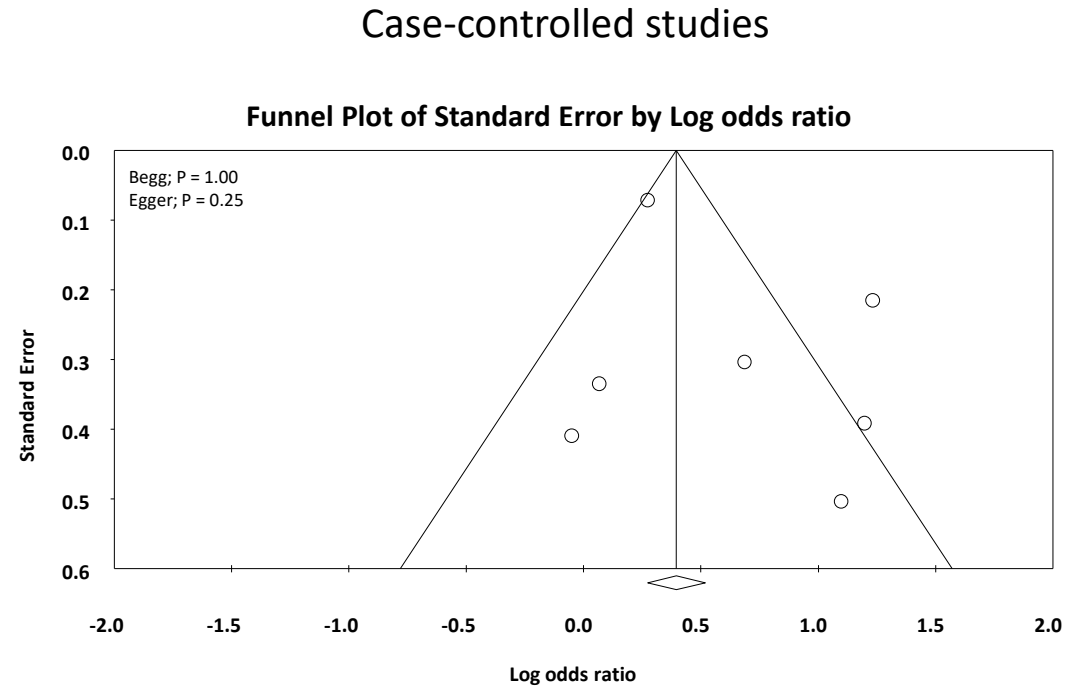

Figure S4. Funnel plots for meta-analysis regarding clinical outcomes of COVID-19 in patients with autoimmune diseases (Observational studies)

## (A) Hospitalization

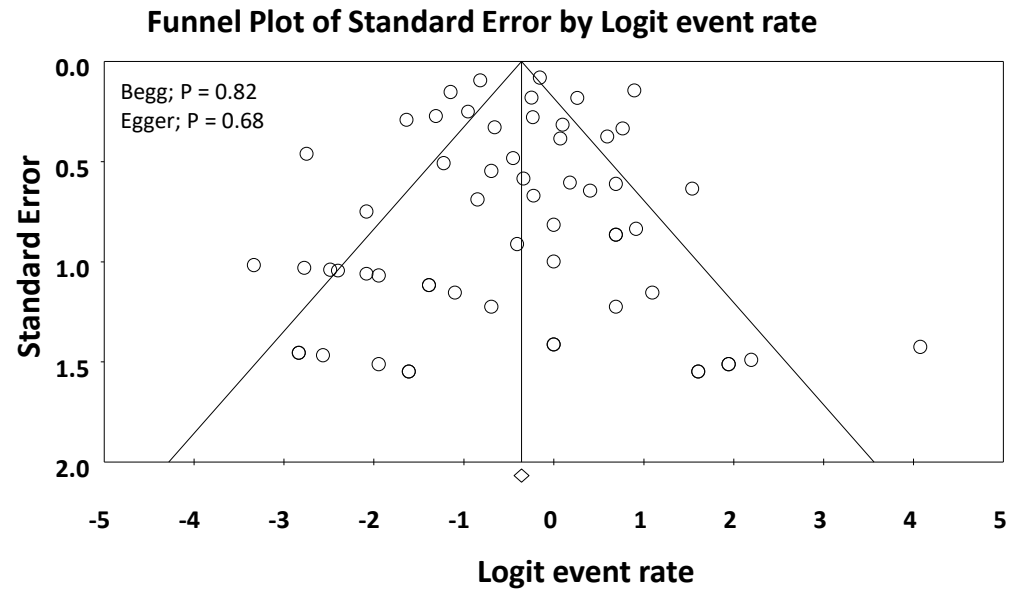

## (B) Death

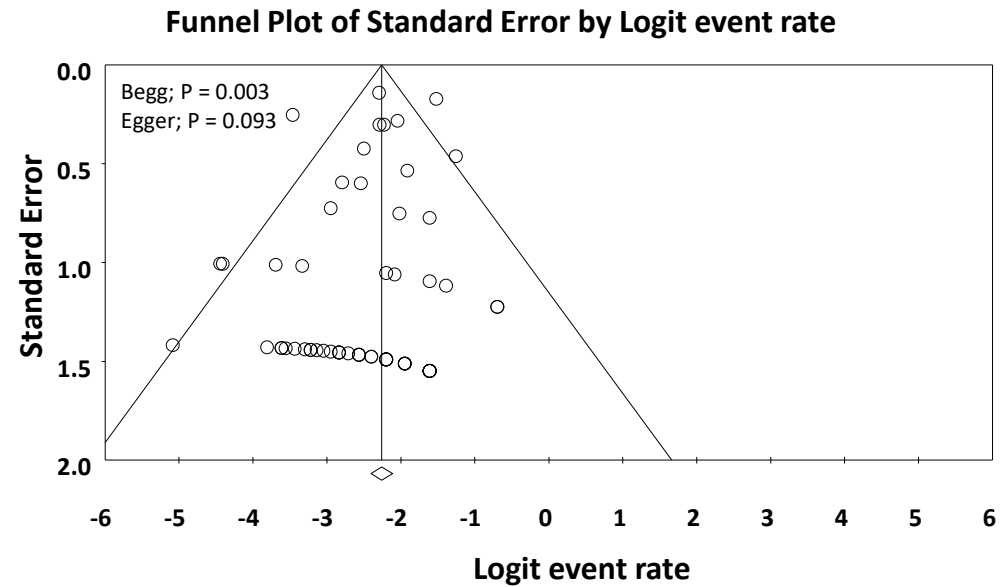

Figure S5. Meta-analysis regarding severe COVID-19 in patients with autoimmune diseases (observational studies)

(A) ICU admission

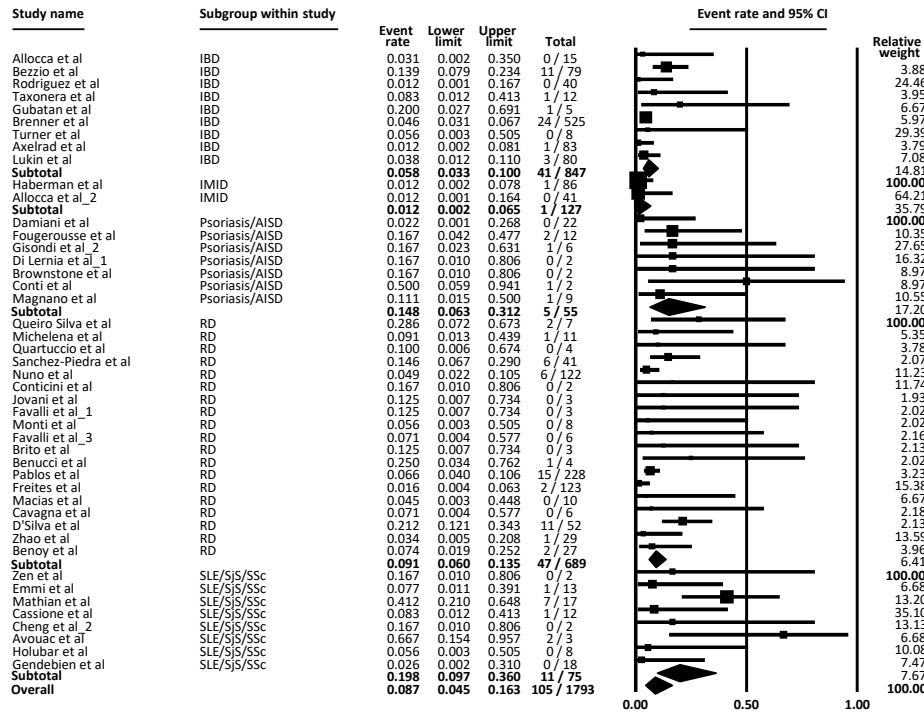

IBD;  $P < 0.001$ , Heterogeneity:  $I^2 = 51.9\%$ ,  $Q = 16.6$ ,  $P = 0.034$   
 IMID (Immune-mediated inflammatory disease);  $P < 0.001$ , Heterogeneity:  $I^2 = 0\%$ ,  $Q = 0.00$ ,  $P = 0.989$   
 Psoriasis/AISD (Autoimmune skin disease);  $P < 0.001$ , Heterogeneity:  $I^2 = 0\%$ ,  $Q = 3.76$ ,  $P = 0.709$   
 RD;  $P < 0.001$ , Heterogeneity:  $I^2 = 31.5\%$ ,  $Q = 26.3$ ,  $P = 0.093$   
 SLE/SjS/SSc;  $P < 0.001$ , Heterogeneity:  $I^2 = 43.5\%$ ,  $Q = 12.4$ ,  $P = 0.089$   
 Overall:  $P < 0.001$ , Heterogeneity:  $I^2 = 48.7\%$ ,  $Q = 85.8$ ,  $P < 0.001$

(B) Mechanical/non-invasive ventilation

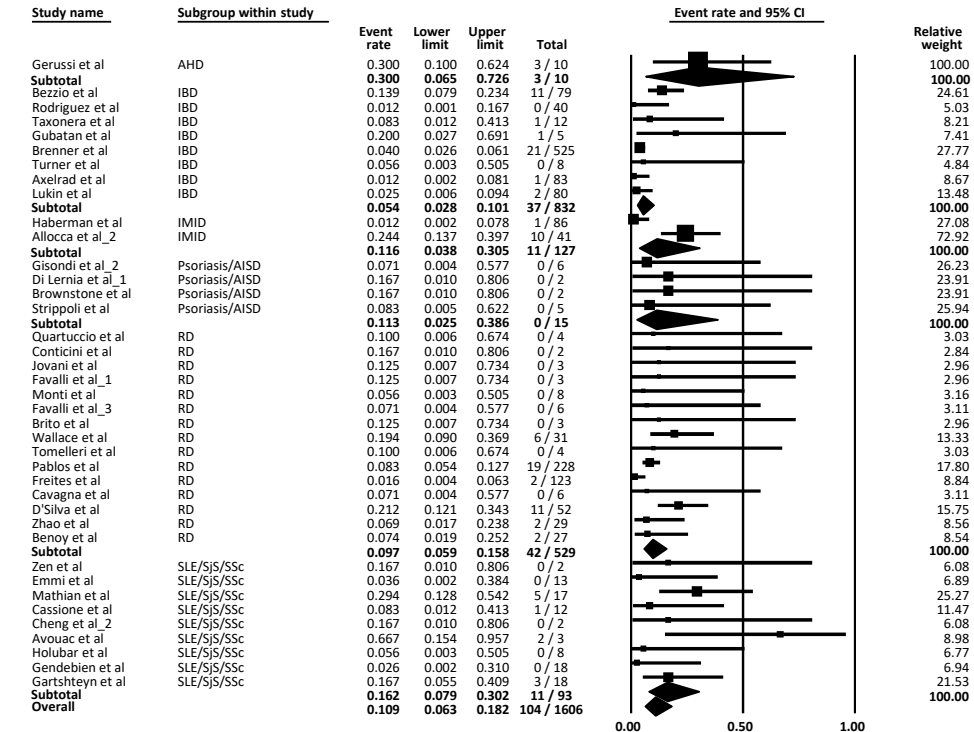

AHD (Autoimmune hepatic disease);  $P = 0.362$ , Heterogeneity:  $I^2 = 0\%$ ,  $Q = 0.00$ ,  $P = 1.000$   
 IBD;  $P < 0.001$ , Heterogeneity:  $I^2 = 63.0\%$ ,  $Q = 18.9$ ,  $P = 0.008$   
 IMID (Immune-mediated inflammatory disease);  $P = 0.001$ , Heterogeneity:  $I^2 = 89.6\%$ ,  $Q = 9.58$ ,  $P = 0.002$   
 Psoriasis/AISD (Autoimmune skin disease);  $P = 0.011$ , Heterogeneity:  $I^2 = 0\%$ ,  $Q = 0.34$ ,  $P = 0.952$   
 RD;  $P < 0.001$ , Heterogeneity:  $I^2 = 23.6\%$ ,  $Q = 18.3$ ,  $P = 0.192$   
 SLE/SjS/SSc;  $P < 0.001$ , Heterogeneity:  $I^2 = 19.4\%$ ,  $Q = 9.93$ ,  $P = 0.270$   
 Overall:  $P < 0.001$ , Heterogeneity:  $I^2 = 54.6\%$ ,  $Q = 83.7$ ,  $P < 0.001$

Figure S6. Clinical outcomes of COVID-19 in patients with autoimmune diseases (case-controlled studies)

(A) Meta-analysis (ICU admission)

| Study name      | Subgroup within study | Odds ratio   |              | ICU / Total   |                 |                     |
|-----------------|-----------------------|--------------|--------------|---------------|-----------------|---------------------|
|                 |                       | Lower limit  | Upper limit  | Cases         | Control         |                     |
| Lukin et al     | IBD                   | 0.528        | 0.143        | 1.948         | 3 / 80          | 11 / 160            |
| <b>Subtotal</b> |                       | <b>0.528</b> | <b>0.062</b> | <b>4.501</b>  | <b>3 / 80</b>   | <b>11 / 160</b>     |
| Damiani et al   | Psoriasis             | 0.963        | 0.058        | 15.878        | 0 / 22          | 1236 / 54801        |
| <b>Subtotal</b> |                       | <b>0.963</b> | <b>0.036</b> | <b>25.533</b> | <b>0 / 22</b>   | <b>1236 / 54801</b> |
| D'Silva et al   | RD                    | 3.718        | 1.347        | 10.264        | 11 / 52         | 7 / 104             |
| Pablos et al    | RD                    | 0.933        | 0.450        | 1.936         | 15 / 228        | 16 / 228            |
| <b>Subtotal</b> |                       | <b>1.777</b> | <b>0.460</b> | <b>6.866</b>  | <b>26 / 280</b> | <b>23 / 332</b>     |
| <b>Overall</b>  |                       | <b>1.222</b> | <b>0.415</b> | <b>3.597</b>  | <b>29 / 382</b> | <b>1270 / 55293</b> |

IBD;  $P = 0.559$ , Heterogeneity:  $I^2 = 0\%$ ,  $Q = 0.00$ ,  $P = 1.000$   
 Psoriasis;  $P = 0.982$ , Heterogeneity:  $I^2 = 0\%$ ,  $Q = 0.00$ ,  $P = 1.000$   
 RD;  $P = 0.404$ , Heterogeneity:  $I^2 = 78.7\%$ ,  $Q = 4.70$ ,  $P = 0.030$   
 Overall:  $P = 0.716$ , Heterogeneity:  $I^2 = 55.6\%$ ,  $Q = 6.75$ ,  $P = 0.080$

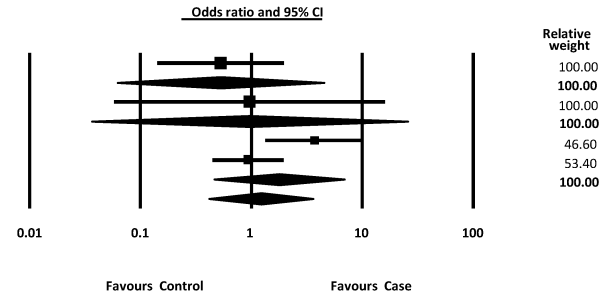

(C) Funnel plot (ICU admission)

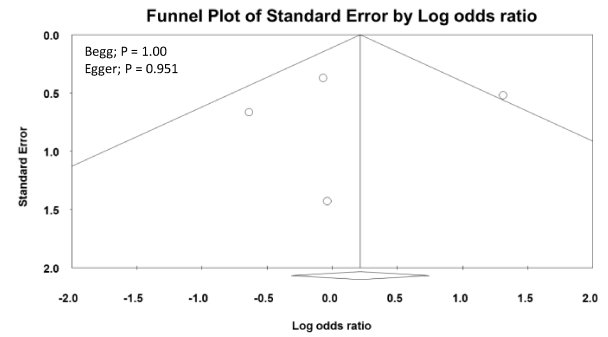

(B) Meta-analysis (Mechanical/non-invasive ventilation)

| Study name      | Subgroup within study | Odds ratio   |              | Ventilation / Total |                 |                 |
|-----------------|-----------------------|--------------|--------------|---------------------|-----------------|-----------------|
|                 |                       | Lower limit  | Upper limit  | Case                | Control         |                 |
| Lukin et al     | IBD                   | 0.347        | 0.075        | 1.606               | 2 / 80          | 11 / 160        |
| <b>Subtotal</b> |                       | <b>0.347</b> | <b>0.038</b> | <b>3.192</b>        | <b>2 / 80</b>   | <b>11 / 160</b> |
| D'Silva et al   | RD                    | 3.718        | 1.347        | 10.264              | 11 / 52         | 7 / 104         |
| Pablos et al    | RD                    | 1.000        | 0.515        | 1.943               | 19 / 228        | 19 / 228        |
| <b>Subtotal</b> |                       | <b>1.819</b> | <b>0.505</b> | <b>6.552</b>        | <b>30 / 280</b> | <b>26 / 332</b> |
| <b>Overall</b>  |                       | <b>1.028</b> | <b>0.220</b> | <b>4.806</b>        | <b>32 / 360</b> | <b>37 / 492</b> |

IBD;  $P = 0.350$ , Heterogeneity:  $I^2 = 0\%$ ,  $Q = 0.00$ ,  $P = 1.000$   
 RD;  $P = 0.360$ , Heterogeneity:  $I^2 = 77.8\%$ ,  $Q = 4.50$ ,  $P = 0.034$   
 Overall:  $P = 0.972$ , Heterogeneity:  $I^2 = 73.5\%$ ,  $Q = 7.55$ ,  $P = 0.023$

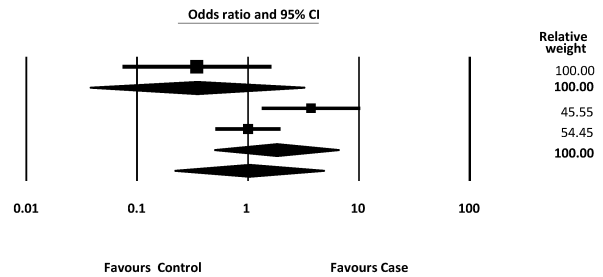

(D) Funnel plot (Ventilation)

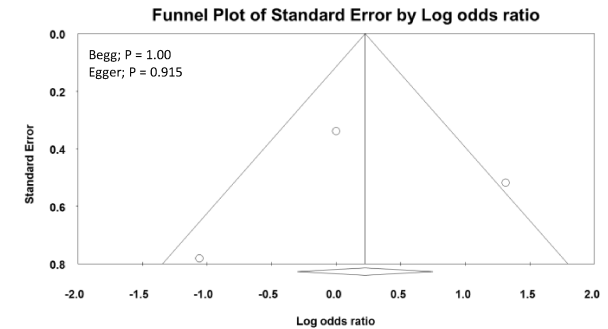

Figure S7. Funnel plots for meta-analysis regarding clinical outcomes of COVID-19 in patients with autoimmune diseases (case-controlled studies)

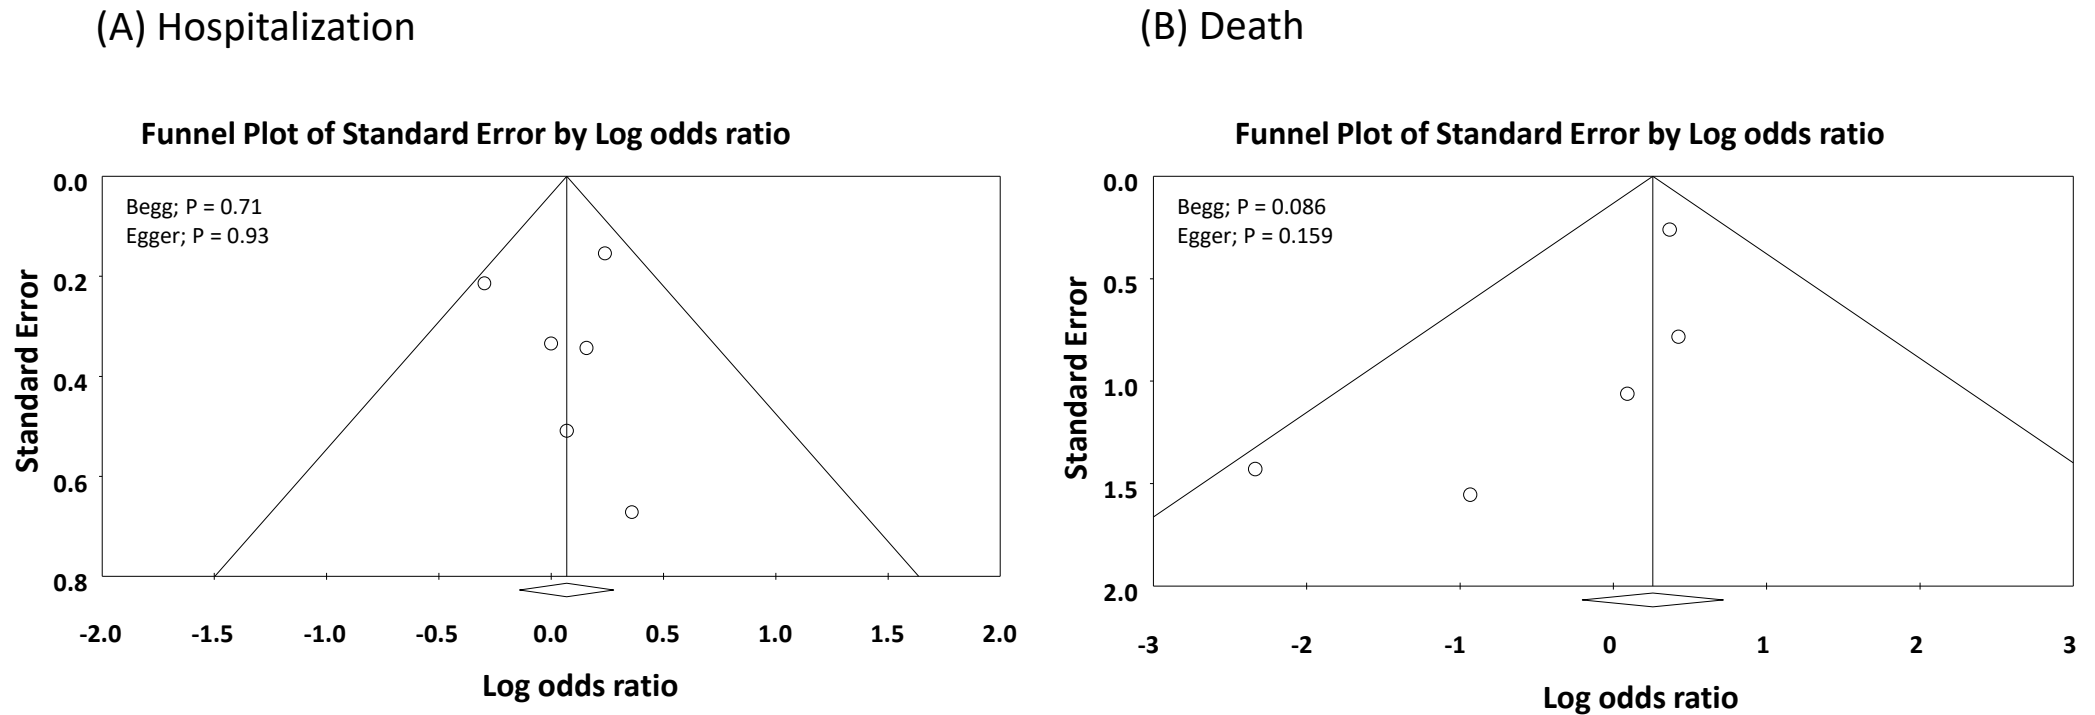

Supplement: annrheumdis-2020-218946supp002_data_supplement.pdf [file annrheumdis-2020-218946supp002_data_supplement.pdf]
