# Supplementary material for: Prevalence and clinical outcomes of COVID-19 in patients with autoimmune diseases: a systematic review and meta-analysis
Source: HighWire-hosted journal article supplement (doi:10.1136/annrheumdis-2020-218946), 2020-10-13
Supplement: annrheumdis-2020-218946supp001_data_supplement.pdf [file annrheumdis-2020-218946supp001_data_supplement.pdf]

Table S1. Characteristics of studies included in the meta-analysis

| Study                              | Study location         | Total number of patients <sup>#</sup> | Diagnosis      | Demographics of patients with autoimmune diseases |             |                   |             |              |                            |                                              | COVID-19               |                                                    | Demographics of patients with autoimmune diseases and COVID-19 |             |                   |             |              |                            |                                              | COVID-19 outcomes <sup>##</sup> |                   |                 |           |
|------------------------------------|------------------------|---------------------------------------|----------------|---------------------------------------------------|-------------|-------------------|-------------|--------------|----------------------------|----------------------------------------------|------------------------|----------------------------------------------------|----------------------------------------------------------------|-------------|-------------------|-------------|--------------|----------------------------|----------------------------------------------|---------------------------------|-------------------|-----------------|-----------|
|                                    |                        |                                       |                | Mean/Median Age (y/o)                             | Male (%)    | Comorbidities (%) | GCs (%)     | csDMARDs (%) | b/tsDMARDs monotherapy (%) | b/tsDMARDs +csDMARDs combination therapy (%) | Number of COVID-19 (n) | Number of Confirmed COVID-19 with positive PCR (n) | Mean/Median Age (y/o)                                          | Male (%)    | Comorbidities (%) | GCs (%)     | csDMARDs (%) | b/tsDMARDs monotherapy (%) | b/tsDMARDs +csDMARDs combination therapy (%) | Hospitalization (n)             | ICU admission (n) | Ventilation (n) | Death (n) |
| Rigamonti et al <sup>1</sup>       | Italy                  | 138                                   | AHD            | 63.5                                              | 8.7         | NA                | NA          | NA           | NA                         | NA                                           | 5                      | 5                                                  | 51.8                                                           | 20.0        | 60.0              | 100.0       | 60.0         | 0.0                        | 0.0                                          | 2                               | NA                | NA              | 0         |
| Gerussi et al <sup>2</sup>         | Italy                  | NA                                    | AHD            | NA                                                | NA          | NA                | NA          | NA           | NA                         | NA                                           | 10                     | 10                                                 | 56.4                                                           | 30.0        | NA                | 60.0        | 30.0         | 0.0                        | 0.0                                          | 6                               | NA                | 3               | 1         |
| <b>Average per study</b>           |                        |                                       | <b>AHD</b>     | <b>63.5</b>                                       | <b>8.7</b>  | <b>NA</b>         | <b>NA</b>   | <b>NA</b>    | <b>NA</b>                  | <b>NA</b>                                    |                        |                                                    | <b>54.1</b>                                                    | <b>25.0</b> | <b>60.0</b>       | <b>80.0</b> | <b>45.0</b>  | <b>0.0</b>                 | <b>0.0</b>                                   |                                 |                   |                 |           |
| Allocca et al <sup>3</sup>         | France/Italy           | 6000                                  | IBD            | NA                                                | NA          | NA                | NA          | NA           | NA                         | NA                                           | 15                     | 15                                                 | 39.1                                                           | 26.7        | 60.0              | 13.3        | 20.0         | 60.0                       | 13.3                                         | 5                               | 0                 | NA              | 0         |
| Norsa et al <sup>4</sup>           | Italy                  | 522                                   | IBD            | 46                                                | 58.0        | NA                | 3.1         | 19.2         | 15.7                       | NA                                           | 0                      | 0                                                  | NA                                                             | NA          | NA                | NA          | NA           | NA                         | NA                                           | NA                              | NA                | NA              | NA        |
| Taxonera et al <sup>5</sup>        | Spain                  | 1918                                  | IBD            | NA                                                | NA          | NA                | NA          | NA           | NA                         | NA                                           | 12                     | 12                                                 | 52.3                                                           | 25.0        | 41.7              | 0.0         | 50.0         | 8.3                        | 33.3                                         | 8                               | 1                 | 1               | 2         |
| An et al <sup>6</sup>              | China                  | 318                                   | IBD            | 39.2                                              | NA          | 15.4              | NA          | NA           | NA                         | NA                                           | 0                      | 0                                                  | NA                                                             | NA          | NA                | NA          | NA           | NA                         | NA                                           | NA                              | NA                | NA              | NA        |
| Grassia et al <sup>7</sup>         | Italy                  | 251                                   | IBD            | NA                                                | NA          | NA                | NA          | NA           | 16.3                       | NA                                           | 1                      | NA                                                 | NA                                                             | NA          | NA                | NA          | 100.0        | 0.0                        | 0.0                                          | NA                              | NA                | NA              | NA        |
| Gubatan et al <sup>8</sup>         | USA                    | 168                                   | IBD            | 47.7                                              | 47.6        | NA                | 20.2        | 8.9          | 28.6                       | NA                                           | 5                      | 5                                                  | 70.6                                                           | 40.0        | NA                | 20.0        | 20.0         | NA                         | NA                                           | 1                               | 1                 | 1               | 1         |
| Singh et al <sup>9</sup>           | USA                    | 196403                                | IBD            | NA                                                | NA          | NA                | NA          | NA           | NA                         | NA                                           | 232                    | 232                                                | 51.2                                                           | 36.6        | NA                | 47.8        | 14.7         | 15.9                       | NA                                           | 56                              | NA                | NA              | NA        |
| Khan et al <sup>10</sup>           | USA                    | 37857                                 | IBD            | NA                                                | NA          | NA                | NA          | NA           | NA                         | NA                                           | 36                     | NA                                                 | 63                                                             | NA          | NA                | NA          | 5.6          | 8.3                        | NA                                           | NA                              | NA                | NA              | NA        |
| Mak et al <sup>11</sup>            | Hong Kong/Taiwan       | 5508                                  | IBD            | 46.9                                              | 67.8        | NA                | 30.6        | 43.4         | 19.2                       | NA                                           | 0                      | 0                                                  | NA                                                             | NA          | NA                | NA          | NA           | NA                         | NA                                           | NA                              | NA                | NA              | NA        |
| Marafini et al <sup>12</sup>       | Italy                  | 672                                   | IBD            | 46                                                | 53.7        | NA                | 4.3         | 6.4          | 35.9                       | NA                                           | 3                      | 3                                                  | NA                                                             | NA          | NA                | NA          | NA           | NA                         | NA                                           | 2                               | NA                | NA              | 1         |
| Turner et al <sup>13</sup>         | China/South Korea      | 272                                   | IBD            | NA                                                | NA          | NA                | NA          | NA           | NA                         | NA                                           | 8                      | 6                                                  | 16.1                                                           | 62.5        | NA                | 12.5        | 50.0         | 37.5                       | 25.0                                         | 0                               | 0                 | 0               | 0         |
| Scalaferrri et al <sup>14</sup>    | Italy                  | 1451                                  | IBD            | 44                                                | 58.0        | NA                | NA          | NA           | 85.1                       | NA                                           | 5                      | 5                                                  | NA                                                             | NA          | NA                | NA          | NA           | NA                         | NA                                           | NA                              | NA                | NA              | NA        |
| Bodini et al <sup>15</sup>         | Italy                  | 48                                    | IBD            | NA                                                | NA          | NA                | NA          | NA           | NA                         | NA                                           | 0                      | 0                                                  | NA                                                             | NA          | NA                | NA          | NA           | NA                         | NA                                           | NA                              | NA                | NA              | NA        |
| Martinelli et al <sup>16</sup>     | Italy                  | 180                                   | IBD            | 15.3                                              | 53.3        | NA                | 5.0         | 33.3         | 12.2                       | 11.1                                         | 0                      | 0                                                  | NA                                                             | NA          | NA                | NA          | NA           | NA                         | NA                                           | NA                              | NA                | NA              | NA        |
| Lukin et al <sup>17</sup>          | USA                    | 1386                                  | IBD            | NA                                                | NA          | NA                | NA          | NA           | NA                         | NA                                           | 80                     | NA                                                 | 48.3                                                           | 56.3        | NA                | 12.5        | NA           | 47.5                       | NA                                           | 17                              | 3                 | 2               | 0         |
| Bezzio et al <sup>18</sup>         | Italy                  | NA                                    | IBD            | NA                                                | NA          | NA                | NA          | NA           | NA                         | NA                                           | 79                     | 49                                                 | 47                                                             | 55.7        | 38.0              | 11.4        | NA           | 59.5                       | NA                                           | 22                              | 11                | 11              | 6         |
| Rodriguez et al <sup>19</sup>      | Spain                  | NA                                    | IBD            | NA                                                | NA          | NA                | NA          | NA           | NA                         | NA                                           | 40                     | 40                                                 | 58.5                                                           | 60.0        | 62.5              | 10.0        | 32.5         | 17.5                       | 5.0                                          | 21                              | 0                 | 0               | 2         |
| Brenner et al <sup>20</sup>        | International registry | NA                                    | IBD            | NA                                                | NA          | NA                | NA          | NA           | NA                         | NA                                           | 525                    | 525                                                | 42.9                                                           | 52.6        | 33.1              | 7.0         | NA           | 55.0                       | 9.9                                          | 161                             | 24                | 21              | 16        |
| Axelrad et al <sup>21</sup>        | USA                    | NA                                    | IBD            | NA                                                | NA          | NA                | NA          | NA           | NA                         | NA                                           | 83                     | 45                                                 | 35                                                             | 53.0        | NA                | 7.2         | 7.2          | 74.7                       | NA                                           | 5                               | 1                 | 1               | 1         |
| <b>Average per study</b>           |                        |                                       | <b>IBD</b>     | <b>40.7</b>                                       | <b>56.4</b> | <b>15.4</b>       | <b>12.6</b> | <b>22.2</b>  | <b>30.4</b>                | <b>11.1</b>                                  |                        |                                                    | <b>47.6</b>                                                    | <b>46.8</b> | <b>47.1</b>       | <b>14.2</b> | <b>33.3</b>  | <b>33.7</b>                | <b>14.4</b>                                  |                                 |                   |                 |           |
| Haberman et al <sup>22</sup>       | USA                    | NA                                    | IMID           | NA                                                | NA          | NA                | NA          | NA           | NA                         | NA                                           | 86                     | 59                                                 | 46                                                             | 43.0        | NA                | 9.3         | 32.6         | 72.1                       | NA                                           | 14                              | 1                 | 1               | 1         |
| Allocca et al <sup>23</sup>        | Italy                  | NA                                    | IMID           | NA                                                | NA          | NA                | NA          | NA           | NA                         | NA                                           | 41                     | 25                                                 | 48                                                             | 41.5        | 31.7              | 17.1        | 24.4         | 65.9                       | NA                                           | 14                              | 0                 | 10              | 1         |
| <b>Average per study</b>           |                        |                                       | <b>IMID</b>    | <b>NA</b>                                         | <b>NA</b>   | <b>NA</b>         | <b>NA</b>   | <b>NA</b>    | <b>NA</b>                  | <b>NA</b>                                    |                        |                                                    | <b>47.0</b>                                                    | <b>42.2</b> | <b>31.7</b>       | <b>13.2</b> | <b>28.5</b>  | <b>69.0</b>                | <b>NA</b>                                    |                                 |                   |                 |           |
| Damiani et al <sup>24</sup>        | Italy                  | 1193                                  | Psoriasis/AISD | 55                                                | 68.0        | NA                | 0.0         | 0.0          | NA                         | NA                                           | 22                     | 22                                                 | 59                                                             | 72.7        | 40.9              | 0.0         | 0.0          | 100.0                      | 0.0                                          | 5                               | 0                 | NA              | 0         |
| Fougerousse et al <sup>25</sup>    | France                 | 1418                                  | Psoriasis/AISD | NA                                                | 56.2        | 35.1              | NA          | 23.0         | 70.9                       | 2.5                                          | 12                     | 12                                                 | NA                                                             | NA          | NA                | NA          | NA           | 66.7                       | 8.3                                          | 5                               | 2                 | NA              | 0         |
| Gisoni et al <sup>26</sup>         | Italy                  | 5206                                  | Psoriasis/AISD | 53.2                                              | 54.2        | NA                | NA          | NA           | 100.0                      | NA                                           | 6                      | NA                                                 | 56.3                                                           | 50.0        | 50.0              | NA          | NA           | 100.0                      | NA                                           | 4                               | 1                 | 0               | 0         |
| Di Lernia et al <sup>27</sup>      | Italy                  | 130                                   | Psoriasis/AISD | 48.4                                              | 54.6        | NA                | NA          | NA           | NA                         | NA                                           | 2                      | 2                                                  | 52                                                             | 0.0         | 50.0              | NA          | 100.0        | NA                         | NA                                           | 0                               | 0                 | 0               | 0         |
| Galluzzo et al <sup>28</sup>       | Italy                  | 119                                   | Psoriasis/AISD | NA                                                | NA          | NA                | NA          | NA           | NA                         | NA                                           | 0                      | 0                                                  | NA                                                             | NA          | NA                | NA          | NA           | NA                         | NA                                           | NA                              | NA                | NA              | NA        |
| Georgakopoulos et al <sup>29</sup> | Canada                 | 2095                                  | Psoriasis/AISD | NA                                                | NA          | NA                | NA          | NA           | NA                         | NA                                           | 0                      | 0                                                  | NA                                                             | NA          | NA                | NA          | NA           | NA                         | NA                                           | NA                              | NA                | NA              | NA        |

|                                            |            |      |                       |             |             |             |            |             |             |            |    |    |             |             |             |             |             |             |            |    |    |    |    |
|--------------------------------------------|------------|------|-----------------------|-------------|-------------|-------------|------------|-------------|-------------|------------|----|----|-------------|-------------|-------------|-------------|-------------|-------------|------------|----|----|----|----|
| Pirro et al <sup>30</sup>                  | Italy      | 226  | Psoriasis/AISD        | 53          | 61.1        | NA          | NA         | NA          | 100.0       | NA         | 0  | 0  | NA          | NA          | NA          | NA          | NA          | NA          | NA         | NA | NA | NA | NA |
| Carugno et al <sup>31</sup>                | Italy      | 159  | Psoriasis/AISD        | 51.5        | 71.7        | NA          | NA         | NA          | 100.0       | NA         | 29 | 0  | 46.6        | 62.1        | 13.8        | NA          | NA          | NA          | NA         | 1  | NA | NA | NA |
| Kuang et al <sup>32</sup>                  | China      | 926  | Psoriasis/AISD        | 33.1        | 63.1        | NA          | NA         | NA          | NA          | NA         | 1  | 1  | NA          | NA          | NA          | NA          | NA          | NA          | NA         | NA | NA | NA | NA |
| Strippoli et al <sup>33</sup>              | Italy      | 139  | Psoriasis/AISD        | NA          | NA          | NA          | NA         | NA          | NA          | NA         | 5  | 3  | 51.8        | 40.0        | 60.0        | NA          | NA          | 100.0       | NA         | 1  | NA | 0  | 0  |
| Brunasso et al <sup>34</sup>               | Italy      | 183  | Psoriasis/AISD        | 48.3        | 51.9        | NA          | 7.1        | 31.7        | 36.1        | NA         | 3  | NA | NA          | NA          | NA          | NA          | 33.3        | 66.7        | NA         | NA | NA | NA | 1  |
| Magnano et al <sup>35</sup>                | Italy      | 720  | Psoriasis/AISD        | NA          | NA          | NA          | NA         | NA          | NA          | NA         | 9  | 9  | 53.9        | 55.6        | 55.6        | NA          | NA          | 100.0       | NA         | 1  | 1  | NA | 0  |
| Balestri et al <sup>36</sup>               | Italy      | 43   | Psoriasis/AISD        | NA          | NA          | NA          | NA         | NA          | NA          | NA         | 1  | 1  | 65          | 0.0         | 0.0         | 0.0         | 100.0       | 0.0         | 0.0        | 0  | 0  | 0  | 0  |
| Di Altobrando et al <sup>37</sup>          | Italy      | 83   | Psoriasis/AISD        | 58.6        | 36.1        | NA          | NA         | NA          | NA          | NA         | 1  | 1  | 53          | 100.0       | NA          | 100.0       | 100.0       | 0.0         | 0.0        | 0  | 0  | 0  | 0  |
| Kutlu et al <sup>1*</sup> <sup>38</sup>    | Turkey     | 93   | Psoriasis/AISD        | NA          | NA          | NA          | NA         | NA          | NA          | NA         | 4  | NA | 59          | 50.0        | NA          | NA          | 50.0        | NA          | NA         | 1  | NA | NA | 0  |
| Brownstone et al <sup>39</sup>             | USA        | NA   | Psoriasis/AISD        | NA          | NA          | NA          | NA         | NA          | NA          | NA         | 2  | 2  | 35          | NA          | NA          | NA          | NA          | 100.0       | NA         | 0  | 0  | 0  | 0  |
| Conti et al <sup>40</sup>                  | Italy      | NA   | Psoriasis/AISD        | NA          | NA          | NA          | NA         | NA          | NA          | NA         | 2  | 2  | 64          | 100.0       | 100.0       | 0.0         | 0.0         | 100.0       | 0.0        | 1  | 1  | NA | 0  |
| <b>Average per study</b>                   |            |      | <b>Psoriasis/AISD</b> | <b>50.1</b> | <b>57.4</b> | <b>35.1</b> | <b>3.6</b> | <b>18.2</b> | <b>81.4</b> | <b>2.5</b> |    |    | <b>54.1</b> | <b>53.0</b> | <b>46.3</b> | <b>25.0</b> | <b>54.8</b> | <b>73.3</b> | <b>1.7</b> |    |    |    |    |
| Michelena et al <sup>41</sup>              | Spain      | 959  | RD                    | NA          | NA          | NA          | NA         | NA          | NA          | NA         | 11 | 11 | 46.2        | 54.5        | 45.5        | 45.5        | 45.5        | 45.5        | 45.5       | 6  | 1  | NA | 0  |
| Quartuccio et al <sup>42</sup>             | Italy      | 1051 | RD                    | 58.4        | 33.1        | NA          | 13.9       | 40.6        | 86.4        | NA         | 4  | 4  | 60.3        | 50.0        | 100.0       | 50.0        | 50.0        | 50.0        | 50.0       | 3  | 0  | 0  | 0  |
| Conticini et al <sup>43</sup>              | Italy      | 859  | RD                    | NA          | NA          | NA          | NA         | NA          | NA          | NA         | 2  | 2  | 69          | 0.0         | 50.0        | 0.0         | 0.0         | 100.0       | 0.0        | 1  | 0  | 0  | 0  |
| Jovani et al <sup>44</sup>                 | Spain      | 1037 | RD                    | NA          | NA          | NA          | NA         | NA          | NA          | NA         | 3  | NA | 65          | 33.3        | 66.7        | 0.0         | 33.3        | 66.7        | 33.3       | 3  | 0  | 0  | 0  |
| Favalli et al <sup>1</sup> <sup>45</sup>   | Italy      | 530  | RD                    | 50.1        | 29.8        | NA          | NA         | NA          | 100.0       | NA         | 3  | 3  | 55          | 66.7        | NA          | 0.0         | 0.0         | 100.0       | 0.0        | 1  | 0  | 0  | 0  |
| Monti et al <sup>46</sup>                  | Italy      | 320  | RD                    | 55          | 31.9        | NA          | NA         | NA          | 100.0       | NA         | 8  | 4  | 57          | 12.5        | 100.0       | 25.0        | 100.0       | 100.0       | NA         | 1  | 0  | 0  | 0  |
| Santos-Moreno et al <sup>47</sup>          | USA        | 3503 | RD                    | NA          | 17.8        | NA          | NA         | NA          | NA          | NA         | 0  | 0  | NA          | NA          | NA          | NA          | NA          | NA          | NA         | NA | NA | NA | NA |
| Michaud et al <sup>48</sup>                | USA        | 530  | RD                    | 65          | 15.7        | NA          | 18.1       | 52.6        | 46.0        | NA         | 0  | 0  | NA          | NA          | NA          | NA          | NA          | NA          | NA         | NA | NA | NA | NA |
| Favalli et al <sup>3</sup> <sup>49</sup>   | Italy      | 955  | RD                    | 52.8        | 32.7        | NA          | 28.3       | 52.7        | 97.1        | NA         | 6  | 6  | NA          | NA          | 66.7        | 0.0         | 66.7        | 33.3        | 66.7       | 3  | 0  | 0  | 0  |
| Zhong et al <sup>50</sup>                  | China      | 6228 | RD                    | 45.9        | 13.0        | NA          | 19.2       | 42.2        | 1.5         | NA         | 27 | 20 | NA          | NA          | NA          | NA          | NA          | NA          | NA         | NA | NA | NA | NA |
| Cuceoglu et al <sup>51</sup>               | Turkey     | 173  | RD                    | 13.3        | 53.2        | NA          | NA         | 20.8        | 100.0       | NA         | 0  | 0  | NA          | NA          | NA          | NA          | NA          | NA          | NA         | NA | NA | NA | NA |
| Mukusheva et al <sup>52</sup>              | Kazakhstan | 600  | RD                    | NA          | NA          | NA          | NA         | NA          | NA          | NA         | 0  | 0  | NA          | NA          | NA          | NA          | NA          | NA          | NA         | NA | NA | NA | NA |
| Favalli et al <sup>4</sup> <sup>53</sup>   | Italy      | 914  | RD                    | 55.9        | 31.7        | NA          | 35.3       | NA          | 71.7        | NA         | 6  | 6  | NA          | NA          | NA          | NA          | NA          | NA          | NA         | 4  | NA | NA | 1  |
| Benucci et al <sup>54</sup>                | Italy      | 295  | RD                    | NA          | NA          | NA          | NA         | NA          | NA          | NA         | 4  | 4  | 60          | 0.0         | 50.0        | 50.0        | 75.0        | 25.0        | 75.0       | 4  | 1  | NA | 0  |
| Zomalheto et al <sup>55</sup>              | Benin      | 68   | RD                    | 49.9        | 4.4         | NA          | 75.0       | NA          | NA          | NA         | 1  | 1  | NA          | NA          | NA          | NA          | 100.0       | NA          | NA         | 0  | 0  | 0  | 0  |
| Seyahi et al <sup>56</sup>                 | Turkey     | 771  | RD                    | 42          | 31.8        | NA          | 44.1       | NA          | 39.6        | NA         | 4  | NA | NA          | NA          | NA          | NA          | NA          | NA          | NA         | NA | NA | NA | NA |
| Salvarani et al <sup>57</sup>              | Italy      | 1195 | RD                    | NA          | 43.8        | NA          | NA         | NA          | NA          | NA         | 9  | 9  | NA          | NA          | NA          | NA          | NA          | 100.0       | NA         | 4  | NA | NA | 1  |
| Fragoulis et al <sup>58</sup>              | Greece     | 500  | RD                    | 53.7        | 26.8        | NA          | 46.6       | 73.4        | NA          | NA         | 39 | 0  | NA          | NA          | NA          | NA          | NA          | NA          | NA         | NA | NA | NA | NA |
| Tomelleri et al <sup>59</sup>              | Italy      | 162  | RD                    | 61          | 27.2        | NA          | 62.3       | 42.6        | 54.9        | 4.9        | 4  | 4  | 57.3        | 50.0        | 100.0       | 100.0       | 50.0        | 0.0         | 50.0       | 2  | NA | 0  | 0  |
| Macias et al <sup>60</sup>                 | Spain      | 722  | RD                    | 57          | 17.2        | NA          | NA         | NA          | NA          | NA         | 10 | 3  | NA          | NA          | NA          | NA          | NA          | NA          | NA         | 3  | 0  | NA | 0  |
| Zhang et al <sup>61</sup>                  | China      | 157  | RD                    | 38.4        | 33.1        | NA          | NA         | NA          | NA          | NA         | 0  | 0  | NA          | NA          | NA          | NA          | NA          | NA          | NA         | NA | NA | NA | NA |
| Cavagna et al <sup>62</sup>                | Italy      | 53   | RD                    | 61          | 28.3        | NA          | NA         | NA          | NA          | NA         | 6  | 0  | 57          | 33.3        | NA          | NA          | NA          | NA          | NA         | 0  | 0  | 0  | 0  |
| Emmi et al <sup>***63</sup>                | Italy      | 458  | RD                    | 56          | 26.0        | NA          | 55.5       | 49.1        | 41.3        | NA         | 13 | 1  | 42          | 15.4        | NA          | 69.2        | 69.2        | 53.8        | NA         | 1  | 1  | 0  | 0  |
| Zen et al <sup>***64</sup>                 | Italy      | 916  | RD                    | 53.6        | 21.4        | NA          | 9.9        | 83.3        | 18.7        | NA         | 2  | 2  | NA          | 0.0         | NA          | 0.0         | 100.0       | 0.0         | 0.0        | 2  | 0  | 0  | 0  |
| Fernandez-Gutierrez et al <sup>***65</sup> | Spain      | 3951 | RD                    | 61.8        | 27.7        | NA          | 45.7       | 75.2        | 20.3        | NA         | 54 | 41 | NA          | NA          | NA          | 59.3        | 75.9        | 14.8        | NA         | 54 | NA | NA | NA |

|                                    |                        |       |                    |             |             |           |             |             |             |            |     |     |             |             |             |             |             |             |             |     |    |    |    |
|------------------------------------|------------------------|-------|--------------------|-------------|-------------|-----------|-------------|-------------|-------------|------------|-----|-----|-------------|-------------|-------------|-------------|-------------|-------------|-------------|-----|----|----|----|
| Pablos et al <sup>266</sup>        | Spain                  | 26131 | RD                 | 65          | 44.0        | NA        | NA          | NA          | NA          | NA         | 199 | 199 | NA          | NA  | NA | NA | NA |
| D'Silva et al <sup>67</sup>        | USA                    | 2154  | RD                 | NA          | NA          | NA        | NA          | NA          | NA          | NA         | 52  | 52  | 62.5        | 30.8        | NA          | 36.5        | 48.1        | 36.5        | NA          | 23  | 11 | 11 | 3  |
| Zhao et al <sup>68</sup>           | China                  | 3059  | RD                 | NA          | NA          | NA        | NA          | NA          | NA          | NA         | 29  | NA  | 61          | 13.8        | 100.0       | 24.1        | NA          | 3.4         | NA          | 29  | 1  | 2  | 1  |
| So et al <sup>69</sup>             | Hong Kong              | 1016  | RD                 | NA          | NA          | NA        | NA          | NA          | NA          | NA         | 5   | 5   | NA          | NA  | NA | NA | NA |
| Benoy et al <sup>70</sup>          | Italy                  | 7600  | RD                 | NA          | NA          | NA        | NA          | NA          | NA          | NA         | 27  | 19  | 68          | 63.0        | 44.4        | 22.2        | 88.9        | 18.5        | NA          | 14  | 2  | 2  | 6  |
| Queiro Silva et al <sup>71</sup>   | Spain                  | NA    | RD                 | NA          | NA          | NA        | NA          | NA          | NA          | NA         | 7   | NA  | 49.3        | 57.1        | NA          | 0.0         | 0.0         | 57.1        | 0.0         | 5   | 2  | NA | 0  |
| Sanchez-Piedra et al <sup>72</sup> | Spain                  | NA    | RD                 | NA          | NA          | NA        | NA          | NA          | NA          | NA         | 41  | 31  | 59.4        | 39.0        | NA          | 48.8        | 56.1        | 53.7        | 56.1        | 28  | 6  | NA | 3  |
| Nuno et al <sup>73</sup>           | Spain                  | NA    | RD                 | NA          | NA          | NA        | NA          | NA          | NA          | NA         | 122 | 100 | 58.3        | 34.4        | NA          | 39.3        | 86.9        | 34.4        | NA          | 69  | 6  | NA | 14 |
| Gianfrancesco et al <sup>74</sup>  | International registry | NA    | RD                 | NA          | NA          | NA        | NA          | NA          | NA          | NA         | 600 | 548 | 57.5        | 29.5        | NA          | 31.5        | 45.3        | 17.8        | 20.7        | 277 | NA | NA | 55 |
| Brito et al <sup>75</sup>          | Brazil                 | NA    | RD                 | NA          | NA          | NA        | NA          | NA          | NA          | NA         | 3   | 3   | 55          | 33.3        | 66.7        | 0.0         | 0.0         | 100.0       | NA          | 0   | 0  | 0  | 0  |
| Wallace et al <sup>76</sup>        | USA                    | NA    | RD                 | NA          | NA          | NA        | NA          | NA          | NA          | NA         | 31  | NA  | 61          | 29.0        | NA          | 38.7        | 77.4        | NA          | NA          | 20  | NA | 6  | 4  |
| Pablos et al <sup>77</sup>         | Spain                  | NA    | RD                 | NA          | NA          | NA        | NA          | NA          | NA          | NA         | 228 | 228 | 63          | 38.2        | NA          | 39.9        | 68.9        | 23.2        | NA          | 162 | 15 | 19 | 41 |
| Freites et al <sup>78</sup>        | Spain                  | NA    | RD                 | NA          | NA          | NA        | NA          | NA          | NA          | NA         | 123 | 58  | 59.9        | 30.1        | NA          | 49.6        | 84.6        | 22.0        | NA          | 54  | 2  | 2  | 12 |
| Marques et al <sup>79</sup>        | Brazil                 | NA    | RD                 | NA          | NA          | NA        | NA          | NA          | NA          | NA         | 130 | NA  | NA          | NA          | NA          | NA          | NA          | NA          | NA          | NA  | NA | NA | 12 |
| <b>Average per study</b>           |                        |       | <b>RD</b>          | <b>52.4</b> | <b>28.1</b> | <b>NA</b> | <b>37.8</b> | <b>53.3</b> | <b>59.8</b> | <b>4.9</b> |     |     | <b>58.3</b> | <b>32.5</b> | <b>71.8</b> | <b>31.7</b> | <b>57.5</b> | <b>46.3</b> | <b>33.1</b> |     |    |    |    |
| Favalli et al <sup>280</sup>       | Italy                  | 123   | SLE/SjS/SSc        | 49.3        | 10.6        | NA        | 64.2        | 59.3        | 20.3        | NA         | 1   | 1   | 32          | 0.0         | NA          | 0.0         | 100.0       | 0.0         | 100.0       | 1   | 1  | 1  | 1  |
| Cassione et al <sup>81</sup>       | Italy                  | 165   | SLE/SjS/SSc        | 52.5        | 32.1        | NA        | 56.4        | NA          | 0.0         | 0.0        | 12  | 4   | 43.3        | 8.3         | NA          | 33.3        | NA          | 0.0         | 0.0         | 1   | 1  | 1  | 0  |
| Favalli et al <sup>582</sup>       | Italy                  | 62    | SLE/SjS/SSc        | 44.1        | 9.7         | NA        | 74.2        | 80.6        | 51.6        | NA         | 0   | 0   | NA          | NA  | NA | NA | NA |
| Cheng et al <sup>283</sup>         | China                  | 101   | SLE/SjS/SSc        | 42          | 11.9        | NA        | 94.1        | 83.2        | 0.0         | 0.0        | 2   | 2   | 24          | 0.0         | NA          | 100.0       | 100.0       | 0.0         | 0.0         | 2   | 0  | 0  | 0  |
| Holubar et al <sup>84</sup>        | France                 | 120   | SLE/SjS/SSc        | 47.1        | 8.3         | NA        | 41.7        | 52.5        | 0.0         | 0.0        | 8   | 0   | NA          | NA          | 25.0        | NA          | NA          | NA          | NA          | 0   | 0  | 0  | 0  |
| Gendebien et al <sup>85</sup>      | Belgium                | 225   | SLE/SjS/SSc        | 51.7        | 7.1         | NA        | 25.3        | 30.7        | 3.6         | NA         | 18  | 5   | NA          | 2   | 0  | 0  | 0  |
| Goyal et al <sup>86</sup>          | India                  | 845   | SLE/SjS/SSc        | 34.8        | 8.0         | NA        | 66.2        | 96.2        | NA          | NA         | 17  | 2   | 29.3        | 0.0         | NA          | 82.4        | 100.0       | 17.6        | NA          | 1   | NA | NA | 0  |
| Gartsheyn et al <sup>87</sup>      | USA                    | 1285  | SLE/SjS/SSc        | NA          | NA          | NA        | NA          | NA          | NA          | NA         | 18  | 10  | 44.3        | 11.1        | NA          | 38.9        | NA          | 16.7        | NA          | 7   | NA | 3  | 0  |
| Mathian et al <sup>88</sup>        | France                 | NA    | SLE/SjS/SSc        | NA          | NA          | NA        | NA          | NA          | NA          | NA         | 17  | 17  | 53.5        | 23.5        | NA          | 70.6        | 100.0       | 0.0         | 0.0         | 14  | 7  | 5  | 2  |
| Avouac et al <sup>89</sup>         | Italy/France           | NA    | SLE/SjS/SSc        | NA          | NA          | NA        | NA          | NA          | NA          | NA         | 3   | 2   | 66.3        | 33.3        | 100.0       | 100.0       | 66.7        | 33.3        | 66.7        | 3   | 2  | 2  | 0  |
| <b>Average per study</b>           |                        |       | <b>SLE/SjS/SSc</b> | <b>45.9</b> | <b>12.5</b> | <b>NA</b> | <b>60.3</b> | <b>67.1</b> | <b>12.6</b> | <b>0.0</b> |     |     | <b>41.8</b> | <b>10.9</b> | <b>62.5</b> | <b>60.7</b> | <b>93.3</b> | <b>9.7</b>  | <b>33.3</b> |     |    |    |    |

# If the parent population of autoimmune diseases was not available, an analysis for the prevalence of COVID-19 was not conducted. ## If all of clinical outcomes regarding COVID-19 were not available, we declined an analysis of COVID-19 outcomes. \* These studies were excluded for an analysis of the prevalence as all of included patients were COVID-19. \*\* This study was excluded for an analysis of COVID-19 outcomes as only hospitalized patients of COVID-19 were included. \*\*\* In these studies, the parent populations were categorized into RD but patients with COVID-19 were in the subgroup of SLE/SjS/SSc.

AHD, autoimmune hepatic diseases; AISD, autoimmune skin diseases; b/tsDMARDs, biologic or targeted synthetic DMARDs (abatacept, belimumab, CD-20, IL-1, IL-6, IL-12/23, IL-23, IL-17,  $\alpha 4\beta 7$  integrin, TNF, and Janus kinase (JAK) inhibitors); csDMARDs, conventional synthetic disease-modifying antirheumatic drugs (hydroxychloroquine, chloroquine, thiopurines, cyclophosphamide, cyclosporine, tacrolimus, leflunomide, methotrexate, mycophenolate mofetil/mycophenolic acid, and sulfasalazine); GCs, glucocorticoids; IBD, inflammatory bowel disease; ICU, intensive care unit; IMID, immune-mediated inflammatory disease; NA, not available; RD, rheumatic diseases; SjS, Sjögren's syndrome; SLE, systemic lupus erythematosus; SSc, systemic sclerosis.

**Table S2.** Subgroup meta-analysis according to comorbidities in patients with autoimmune diseases diagnosed with COVID-19

| Subgroup      | Outcomes        | Number of studies | Event (n) | Total (n) | Event rate | 95% CI      | $I^2$ (%) | Q     | P-value |
|---------------|-----------------|-------------------|-----------|-----------|------------|-------------|-----------|-------|---------|
| Age $\geq$ 64 | Hospitalization | 11                | 193       | 300       | 0.632      | 0.506-0.742 | 39.6      | 16.6  | 0.085   |
|               | ICU             | 8                 | 13        | 124       | 0.128      | 0.078-0.201 | 0         | 4.74  | 0.692   |
|               | Ventilation     | 8                 | 13        | 118       | 0.135      | 0.082-0.213 | 0         | 6.39  | 0.495   |
|               | Death           | 10                | 14        | 130       | 0.134      | 0.084-0.207 | 0         | 6.18  | 0.722   |
| Age < 64      | Hospitalization | 22                | 300       | 959       | 0.339      | 0.271-0.414 | 34.5      | 32.1  | 0.057   |
|               | ICU             | 16                | 17        | 509       | 0.059      | 0.038-0.092 | 2.58      | 15.4  | 0.423   |
|               | Ventilation     | 14                | 13        | 474       | 0.049      | 0.031-0.076 | 0         | 12.9  | 0.452   |
|               | Death           | 21                | 5         | 529       | 0.045      | 0.027-0.074 | 0         | 17.8  | 0.600   |
| Male          | Hospitalization | 24                | 272       | 680       | 0.405      | 0.306-0.513 | 66.0      | 67.6  | < 0.001 |
|               | ICU             | 19                | 22        | 491       | 0.094      | 0.053-0.161 | 31.6      | 26.3  | 0.092   |
|               | Ventilation     | 15                | 14        | 444       | 0.061      | 0.035-0.102 | 9.0       | 15.4  | 0.353   |
|               | Death           | 25                | 28        | 524       | 0.101      | 0.066-0.150 | 18.7      | 29.5  | 0.201   |
| Female        | Hospitalization | 34                | 382       | 1074      | 0.338      | 0.267-0.417 | 58.2      | 79.0  | <0.001  |
|               | ICU             | 27                | 17        | 560       | 0.063      | 0.044-0.091 | 0         | 18.5  | 0.855   |
|               | Ventilation     | 23                | 17        | 515       | 0.067      | 0.046-0.098 | 0         | 20.5  | 0.55    |
|               | Death           | 35                | 16        | 615       | 0.067      | 0.047-0.094 | 0         | 20.7  | 0.964   |
| HTN           | Hospitalization | 15                | 224       | 368       | 0.579      | 0.488-0.664 | 31.0      | 20.3  | 0.121   |
|               | ICU             | 12                | 4         | 45        | 0.173      | 0.086-0.317 | 0         | 4.5   | 0.952   |
|               | Ventilation     | 9                 | 1         | 32        | 0.127      | 0.054-0.272 | 0         | 0.26  | 1.00    |
|               | Death           | 16                | 14        | 108       | 0.188      | 0.125-0.273 | 0         | 4.96  | 0.992   |
| No HTN        | Hospitalization | 21                | 268       | 834       | 0.313      | 0.235-0.403 | 65.6      | 58.2  | <0.001  |
|               | ICU             | 15                | 4         | 268       | 0.066      | 0.034-0.127 | 7.75      | 15.2  | 0.366   |
|               | Ventilation     | 11                | 3         | 188       | 0.080      | 0.036-0.168 | 8.97      | 11.0  | 0.359   |
|               | Death           | 22                | 5         | 386       | 0.058      | 0.034-0.095 | 0         | 14.9  | 0.827   |
| DM            | Hospitalization | 8                 | 88        | 125       | 0.698      | 0.611-0.773 | 0         | 4.78  | 0.687   |
|               | ICU             | 4                 | 1         | 12        | 0.191      | 0.052-0.502 | 0         | 1.58  | 0.664   |
|               | Ventilation     | 3                 | 0         | 9         | 0.131      | 0.026-0.459 | 0         | 0.18  | 0.912   |
|               | Death           | 5                 | 2         | 26        | 0.139      | 0.047-0.345 | 0         | 2.35  | 0.672   |
| No DM         | Hospitalization | 27                | 445       | 1195      | 0.351      | 0.274-0.437 | 73.9      | 99.6  | <0.001  |
|               | ICU             | 18                | 25        | 364       | 0.101      | 0.054-0.180 | 46.2      | 31.6  | 0.017   |
|               | Ventilation     | 16                | 25        | 335       | 0.116      | 0.069-0.190 | 30.8      | 21.7  | 0.117   |
|               | Death           | 24                | 24        | 519       | 0.081      | 0.058-0.112 | 0         | 14.0  | 0.927   |
| BMI $\geq$ 30 | Hospitalization | 4                 | 28        | 51        | 0.486      | 0.229-0.751 | 33.9      | 4.54  | 0.209   |
|               | ICU             | 3                 | 1         | 9         | 0.182      | 0.046-0.508 | 0         | 0.020 | 0.99    |
|               | Ventilation     | 0                 | 0         | 4         | NA         | NA          | NA        | NA    | NA      |
|               | Death           | 5                 | 9         | 65        | 0.156      | 0.087-0.264 | 0         | 0.29  | 0.99    |

|                      |                 |    |     |     |       |             |      |      |       |
|----------------------|-----------------|----|-----|-----|-------|-------------|------|------|-------|
| BMI < 30             | Hospitalization | 19 | 108 | 267 | 0.418 | 0.305-0.542 | 50.6 | 36.4 | 0.006 |
|                      | ICU             | 15 | 19  | 175 | 0.141 | 0.094-0.206 | 0    | 10.1 | 0.752 |
|                      | Ventilation     | 11 | 15  | 129 | 0.140 | 0.089-0.212 | 0    | 5.16 | 0.881 |
|                      | Death           | 20 | 19  | 280 | 0.104 | 0.072-0.148 | 0    | 9.66 | 0.961 |
| Comorbidity<br>(≥ 1) | Hospitalization | 19 | 145 | 274 | 0.518 | 0.370-0.662 | 40.8 | 30.4 | 0.034 |
|                      | ICU             | 19 | 21  | 306 | 0.105 | 0.069-0.158 | 3.50 | 18.7 | 0.413 |
|                      | Ventilation     | 14 | 17  | 268 | 0.087 | 0.058-0.13  | 0    | 8.82 | 0.786 |
|                      | Death           | 23 | 23  | 328 | 0.105 | 0.074-0.147 | 0    | 19.8 | 0.596 |
| No comorbidity       | Hospitalization | 11 | 93  | 402 | 0.237 | 0.192-0.289 | 1.03 | 10.1 | 0.431 |
|                      | ICU             | 12 | 12  | 443 | 0.043 | 0.027-0.068 | 0    | 6.34 | 0.850 |
|                      | Ventilation     | 7  | 9   | 386 | 0.048 | 0.022-0.102 | 14.7 | 7.04 | 0.318 |
|                      | Death           | 15 | 5   | 462 | 0.041 | 0.023-0.074 | 2.33 | 14.3 | 0.425 |

BMI, body mass index; DM, diabetes; HTN, hypertension; ICU, intensive care unit.

**Table S3.** Subgroup meta-analysis according to medical therapies in patients with autoimmune diseases diagnosed with COVID-19

| Subgroup                                    | Outcomes        | Number of studies | Event (n) | Total (n) | Event rate | 95% CI      | $I^2$ (%) | Q    | P-value |
|---------------------------------------------|-----------------|-------------------|-----------|-----------|------------|-------------|-----------|------|---------|
| Glucocorticoids                             | Hospitalization | 20                | 241       | 421       | 0.560      | 0.462-0.653 | 43.4      | 33.5 | 0.021   |
|                                             | ICU             | 16                | 13        | 161       | 0.143      | 0.089-0.221 | 0         | 13.3 | 0.578   |
|                                             | Ventilation     | 14                | 11        | 155       | 0.126      | 0.076-0.202 | 0         | 11.1 | 0.603   |
|                                             | Death           | 22                | 19        | 190       | 0.147      | 0.102-0.206 | 0         | 6.89 | 0.998   |
| csDMARDs                                    | Hospitalization | 23                | 297       | 616       | 0.440      | 0.351-0.533 | 49.2      | 43.3 | 0.004   |
|                                             | ICU             | 18                | 8         | 213       | 0.101      | 0.057-0.171 | 1.18      | 17.2 | 0.441   |
|                                             | Ventilation     | 16                | 6         | 197       | 0.097      | 0.051-0.179 | 10.0      | 16.7 | 0.339   |
|                                             | Death           | 24                | 20        | 266       | 0.120      | 0.085-0.168 | 0         | 8.96 | 0.996   |
| b/tsDMARDs (Monotherapy)                    | Hospitalization | 28                | 153       | 755       | 0.249      | 0.186-0.325 | 54.7      | 59.6 | <0.001  |
|                                             | ICU             | 24                | 12        | 574       | 0.058      | 0.037-0.091 | 3.20      | 23.8 | 0.417   |
|                                             | Ventilation     | 18                | 5         | 495       | 0.041      | 0.024-0.070 | 0         | 15.2 | 0.583   |
|                                             | Death           | 30                | 5         | 645       | 0.054      | 0.034-0.085 | 0         | 27.5 | 0.544   |
| b/tsDMARDs + csDMARDs (Combination)         | Hospitalization | 10                | 78        | 198       | 0.409      | 0.309-0.518 | 15.5      | 10.6 | 0.301   |
|                                             | ICU             | 10                | 8         | 78        | 0.141      | 0.076-0.245 | 0         | 7.73 | 0.561   |
|                                             | Ventilation     | 8                 | 4         | 70        | 0.130      | 0.051-0.295 | 18.1      | 8.55 | 0.287   |
|                                             | Death           | 11                | 2         | 80        | 0.093      | 0.045-0.184 | 0         | 2.88 | 0.984   |
| b/tsDMARDs (Monotherapy or Combination)     | Hospitalization | 32                | 237       | 958       | 0.291      | 0.223-0.370 | 61.4      | 80.2 | <0.001  |
|                                             | ICU             | 27                | 22        | 657       | 0.085      | 0.053-0.133 | 22.2      | 33.4 | 0.151   |
|                                             | Ventilation     | 21                | 10        | 568       | 0.060      | 0.035-0.102 | 13.0      | 23.0 | 0.290   |
|                                             | Death           | 34                | 8         | 730       | 0.048      | 0.032-0.073 | 0         | 27.5 | 0.736   |
| Anti-TNF drugs (Monotherapy)                | Hospitalization | 18                | 53        | 362       | 0.191      | 0.126-0.278 | 33.8      | 25.7 | 0.080   |
|                                             | ICU             | 19                | 5         | 340       | 0.060      | 0.034-0.102 | 0         | 17.0 | 0.523   |
|                                             | Ventilation     | 14                | 1         | 306       | 0.053      | 0.026-0.105 | 0         | 11.8 | 0.542   |
|                                             | Death           | 22                | 2         | 374       | 0.062      | 0.035-0.108 | 0         | 15.7 | 0.785   |
| Anti-TNF drugs + csDMARDs (Combination)     | Hospitalization | 5                 | 25        | 61        | 0.408      | 0.291-0.536 | 0         | 3.22 | 0.522   |
|                                             | ICU             | 4                 | 5         | 59        | 0.108      | 0.049-0.222 | 0         | 2.07 | 0.559   |
|                                             | Ventilation     | 3                 | 2         | 56        | 0.061      | 0.020-0.175 | 0         | 1.51 | 0.471   |
|                                             | Death           | 5                 | 2         | 61        | 0.075      | 0.028-0.186 | 0         | 2.12 | 0.714   |
| Anti-TNF drugs (Monotherapy or combination) | Hospitalization | 22                | 83        | 429       | 0.246      | 0.166-0.349 | 44.6      | 37.9 | 0.013   |
|                                             | ICU             | 22                | 10        | 406       | 0.062      | 0.039-0.096 | 0         | 16.8 | 0.724   |
|                                             | Ventilation     | 17                | 3         | 368       | 0.049      | 0.027-0.087 | 0         | 13.8 | 0.617   |
|                                             | Death           | 26                | 5         | 442       | 0.057      | 0.035-0.091 | 0         | 17.9 | 0.847   |
| Non-TNF drugs (Monotherapy)                 | Hospitalization | 18                | 56        | 246       | 0.284      | 0.181-0.415 | 49.1      | 33.4 | 0.010   |
|                                             | ICU             | 16                | 6         | 224       | 0.069      | 0.039-0.118 | 0         | 11.0 | 0.752   |

|                                                  |                 |    |    |     |       |             |      |      |       |
|--------------------------------------------------|-----------------|----|----|-----|-------|-------------|------|------|-------|
|                                                  | Ventilation     | 11 | 4  | 187 | 0.055 | 0.028-0.102 | 0    | 4.20 | 0.938 |
|                                                  | Death           | 21 | 3  | 260 | 0.074 | 0.042-0.127 | 0    | 13.7 | 0.846 |
| Non-TNF drugs<br>+ csDMARDs<br>(Combination)     | Hospitalization | 3  | 4  | 6   | 0.631 | 0.173-0.933 | 30.5 | 2.88 | 0.237 |
|                                                  | ICU             | 3  | 2  | 6   | 0.369 | 0.067-0.827 | 30.5 | 2.88 | 0.237 |
|                                                  | Ventilation     | 2  | 2  | 4   | 0.500 | 0.041-0.959 | 53.7 | 2.16 | 0.142 |
|                                                  | Death           | 3  | 0  | 6   | 0.167 | 0.033-0.536 | 0    | 0.00 | 1.000 |
| Non-TNF drugs<br>(Monotherapy or<br>combination) | Hospitalization | 21 | 64 | 256 | 0.331 | 0.218-0.467 | 51.7 | 41.4 | 0.003 |
|                                                  | ICU             | 19 | 10 | 235 | 0.102 | 0.059-0.172 | 11.0 | 20.2 | 0.320 |
|                                                  | Ventilation     | 13 | 7  | 193 | 0.078 | 0.043-0.139 | 2.26 | 12.3 | 0.424 |
|                                                  | Death           | 24 | 3  | 271 | 0.077 | 0.045-0.129 | 0    | 14.0 | 0.928 |

b/tsDMARDs, biologic or targeted synthetic DMARDs (abatacept, belimumab, CD-20, IL-1, IL-6, IL-12/23, IL-23, IL-17,  $\alpha$ 4 $\beta$ 7 integrin, TNF, and Janus kinase (JAK) inhibitors); csDMARDs, conventional synthetic disease-modifying antirheumatic drugs (hydroxychloroquine, chloroquine, thiopurines, cyclophosphamide, cyclosporine, tacrolimus, leflunomide, methotrexate, mycophenolate mofetil,/mycophenolic acid, and sulfasalazine); HTN, hypertension; ICU, intensive care unit; TNF, tumor necrosis factor.

**Table S4.** Grading of Recommendations, Assessment, Development, and Evaluation (GRADE) criteria for studies included in the meta-analysis

## (A) Meta-analysis of observational studies

| Number of participants | Starting Level of Evidence | Quality assessment |                      |              |             |                  | Reasons to increase level of evidence<br>(Large magnitude of effect; Dose-response gradient; Potential confounding) | Overall quality of evidence |
|------------------------|----------------------------|--------------------|----------------------|--------------|-------------|------------------|---------------------------------------------------------------------------------------------------------------------|-----------------------------|
|                        |                            | Risk of Bias       | Inconsistency        | Indirectness | Imprecision | Publication bias |                                                                                                                     |                             |
| 319,025                | High                       | Not serious        | Serious <sup>1</sup> | Not serious  | Not serious | Not serious      | N/A                                                                                                                 | Moderate                    |

1. due to heterogeneity

## (B) Meta-analysis of case-controlled studies

| Number of participants                          | Starting Level of Evidence | Quality assessment |                      |              |             |                  | Reasons to increase level of evidence<br>(Large magnitude of effect; Dose-response gradient; Potential confounding) | Overall quality of evidence |
|-------------------------------------------------|----------------------------|--------------------|----------------------|--------------|-------------|------------------|---------------------------------------------------------------------------------------------------------------------|-----------------------------|
|                                                 |                            | Risk of Bias       | Inconsistency        | Indirectness | Imprecision | Publication bias |                                                                                                                     |                             |
| 30,771 (case)<br>and<br>24,511,773<br>(control) | High                       | Not serious        | Serious <sup>1</sup> | Not serious  | Not serious | Not serious      | N/A                                                                                                                 | Moderate                    |

1. due to heterogeneity



### Supplementary References

1. Rigamonti C, Cittone MG, De Benedittis C, et al. Rates of Symptomatic SARS-CoV-2 Infection in Patients With Autoimmune Liver Diseases in Northern Italy: A Telemedicine Study. *Clin Gastroenterol Hepatol*. 2020.
2. Gerussi A, Rigamonti C, Elia C, et al. Coronavirus Disease 2019 in Autoimmune Hepatitis: A Lesson From Immunosuppressed Patients. *Hepatol Commun*. 2020.
3. Allocca M, Fiorino G, Zallot C, et al. Incidence and Patterns of COVID-19 Among Inflammatory Bowel Disease Patients From the Nancy and Milan Cohorts. *Clin Gastroenterol Hepatol*. 2020; 18(9): 2134-2135.
4. Norsa L, Indriolo A, Sansotta N, et al. Uneventful Course in Patients With Inflammatory Bowel Disease During the Severe Acute Respiratory Syndrome Coronavirus 2 Outbreak in Northern Italy. *Gastroenterology*. 2020; 159(1): 371-372.
5. Taxonera C, Sagastagoitia I, Alba C, et al. 2019 novel coronavirus disease (COVID-19) in patients with inflammatory bowel diseases. *Aliment Pharmacol Ther*. 2020; 52(2): 276-283.
6. An P, Ji M, Ren H, et al. Prevention of COVID-19 in patients with inflammatory bowel disease in Wuhan, China. *Lancet Gastroenterol Hepatol*. 2020; 5(6): 525-527.
7. Grassia R, Soro S, Conti CB. Inflammatory Bowel Diseases and Biological Treatment in SARS-CoV-2 Era. Why Not? *Inflamm Bowel Dis*. 2020; 26(7): e71.
8. Gubatan J, Levitte S, Balabanis T, et al. SARS-CoV-2 Testing, Prevalence, and Predictors of COVID-19 in Patients with Inflammatory Bowel Disease in Northern California. *Gastroenterology*. 2020.
9. Singh S, Khan A, Chowdhry M, et al. Risk of Severe COVID-19 in Patients with Inflammatory Bowel Disease in United States. A Multicenter Research Network Study. *Gastroenterology*. 2020.
10. Khan N, Patel D, Xie D, et al. Impact of Anti-TNF and Thiopurines medications on the development of COVID-19 in patients with inflammatory bowel disease: A Nationwide VA cohort study. *Gastroenterology*. 2020.
11. Mak JWY, Weng MT, Wei SC, Ng SC. Zero COVID-19 infection in inflammatory bowel disease patients: Findings from population-based inflammatory bowel disease registries in Hong Kong and Taiwan. *J Gastroenterol Hepatol*. 2020.
12. Marafini I, Salvatori S, Sena G, et al. Low frequency of COVID-19 in inflammatory bowel diseases. *Dig Liver Dis*. 2020.
13. Turner D, Huang Y, Martin-de-Carpi J, et al. Corona Virus Disease 2019 and Paediatric Inflammatory Bowel Diseases: Global Experience and Provisional Guidance (March 2020) from the Paediatric IBD Porto Group of European Society of Paediatric Gastroenterology, Hepatology, and Nutrition. *J Pediatr Gastroenterol Nutr*. 2020; 70(6): 727-733.
14. Scaldaferrri F, Pugliese D, Privitera G, et al. Impact of COVID-19 pandemic on the daily management of biotechnological therapy in inflammatory bowel disease patients: Reorganisational response in a high-volume Italian inflammatory bowel disease centre. *United European Gastroenterol J*. 2020; 8(7): 775-781.
15. Bodini G, Demarzo MG, Casagrande E, et al. Concerns related to COVID-19 pandemic among patients with inflammatory bowel disease and its influence on patient management. *Eur J Clin Invest*. 2020; 50(5): e13233.
16. Martinelli M, Strisciuglio C, Fedele F, Miele E, Staiano A. Clinical and Psychological Issues in Children with Inflammatory Bowel Disease During COVID-19 Pandemic. *Inflamm Bowel Dis*. 2020.
17. Lukin DJ, Kumar A, Hajifathalian K, et al. Baseline Disease Activity and Steroid Therapy Stratify Risk of COVID-19 in Patients with Inflammatory Bowel Disease. *Gastroenterology*. 2020.
18. Bezzio C, Saibeni S, Variola A, et al. Outcomes of COVID-19 in 79 patients with IBD in Italy: an IG-IBD study. *Gut*. 2020; 69(7): 1213-1217.
19. Rodriguez-Lago I, Ramirez de la Piscina P, Elorza A, et al. Characteristics and Prognosis of Patients With Inflammatory Bowel Disease During the SARS-CoV-2 Pandemic in the Basque Country (Spain). *Gastroenterology*. 2020.
20. Brenner EJ, Ungaro RC, Geary RB, et al. Corticosteroids, But Not TNF Antagonists, Are Associated With Adverse COVID-19

Outcomes in Patients With Inflammatory Bowel Diseases: Results From an International Registry. *Gastroenterology*. 2020.

21. Axelrad JE, Malter L, Hong S, et al. From the American Epicenter: Coronavirus Disease 2019 in Patients with Inflammatory Bowel Disease in the New York City Metropolitan Area. *Inflamm Bowel Dis*. 2020.

22. Haberman R, Axelrad J, Chen A, et al. Covid-19 in Immune-Mediated Inflammatory Diseases - Case Series from New York. *N Engl J Med*. 2020; 383(1): 85-88.

23. Allocca M, Guidelli GM, Borroni RG, et al. Clinical course of COVID-19 in 41 patients with immune-mediated inflammatory diseases: Experience from humanitas center, Milan. *Pharmacol Res*. 2020; 160: 105061.

24. Damiani G, Pacifico A, Bragazzi NL, Malagoli P. Biologics increase the risk of SARS-CoV-2 infection and hospitalization, but not ICU admission and death: Real-life data from a large cohort during red-zone declaration. *Dermatol Ther*. 2020: e13475.

25. Fougousse AC, Perrussel M, Becherel PA, et al. Systemic or biologic treatment in psoriasis patients does not increase the risk of a severe form of COVID-19. *J Eur Acad Dermatol Venereol*. 2020.

26. Gisondi P, Facheris P, Dapavo P, et al. The impact of the COVID-19 pandemic on patients with chronic plaque psoriasis being treated with biological therapy: the Northern Italy experience. *Br J Dermatol*. 2020; 183(2): 373-374.

27. Di Lernia V, Goldust M, Feliciani C. Covid-19 infection in psoriasis patients treated with cyclosporin. *Dermatol Ther*. 2020: e13739.

28. Galluzzo M, Tofani L, Bianchi L, Talamonti M. Status of a real-life cohort of patients with moderate-to-severe plaque psoriasis treated with secukinumab and considerations on the use of biological agents in the Covid-19 era. *Expert Opin Biol Ther*. 2020; 20(8): 829-830.

29. Georgakopoulos JR, Mufti A, Vender R, Yeung J. Treatment discontinuation and rate of disease transmission in psoriasis patients on biologic therapy during the COVID-19 pandemic - A Canadian Multicenter Retrospective Study. *J Am Acad Dermatol*. 2020.

30. Pirro F, Caldarola G, Chiricozzi A, et al. The impact of COVID-19 pandemic in a cohort of Italian psoriatic patients treated with biological therapies. *J Dermatolog Treat*. 2020: 1-5.

31. Carugno A, Gambini DM, Raponi F, et al. COVID-19 and biologics for psoriasis: A high-epidemic area experience-Bergamo, Lombardy, Italy. *J Am Acad Dermatol*. 2020; 83(1): 292-294.

32. Kuang Y, Shen M, Wang Q, et al. Association of outdoor activity restriction and income loss with patient-reported outcomes of psoriasis during the COVID-19 pandemic: A web-based survey. *J Am Acad Dermatol*. 2020; 83(2): 670-672.

33. Strippoli D, Barbagallo T, Prestinari F, Russo G, Fantini F. Biologic agents in psoriasis: our experience during coronavirus infection. *Int J Dermatol*. 2020; 59(8): e266-e267.

34. Brunasso AMG, Massone C. Teledermatologic monitoring for chronic cutaneous autoimmune diseases with smartworking during COVID-19 emergency in a tertiary center in Italy. *Dermatol Ther*. 2020: e13495.

35. Magnano M, Balestri R, Bardazzi F, et al. Psoriasis, COVID-19, and acute respiratory distress syndrome: Focusing on the risk of concomitant biological treatment. *Dermatol Ther*. 2020: e13706.

36. Balestri R, Rech G, Girardelli CR. Occurrence of SARS-CoV-2 during mycophenolate mofetil treatment for pemphigus. *J Eur Acad Dermatol Venereol*. 2020.

37. Di Altobrando A, Patrizi A, Bardazzi F. Should SARS-CoV-2 influence immunosuppressive therapy for autoimmune blistering diseases? *J Eur Acad Dermatol Venereol*. 2020; 34(7): e295-e297.

38. Kutlu O, Metin A. Dermatological diseases presented before COVID-19: Are patients with psoriasis and superficial fungal infections more vulnerable to the COVID-19? *Dermatol Ther*. 2020: e13509.

39. Brownstone ND, Thibodeaux QG, Reddy VD, et al. Novel Coronavirus Disease (COVID-19) and Biologic Therapy for Psoriasis: Successful Recovery in Two Patients After Infection with Severe Acute Respiratory Syndrome Coronavirus 2 (SARS-CoV-2). *Dermatol Ther (Heidelb)*. 2020; 10(4): 881-885.

40. Conti A, Lasagni C, Bigi L, Pellacani G. Evolution of COVID-19 infection in four psoriatic patients treated with biological drugs. *J Eur Acad Dermatol Venereol.* 2020; 34(8): e360-e361.
41. Michelena X, Borrell H, Lopez-Corbeto M, et al. Incidence of COVID-19 in a cohort of adult and paediatric patients with rheumatic diseases treated with targeted biologic and synthetic disease-modifying anti-rheumatic drugs. *Semin Arthritis Rheum.* 2020; 50(4): 564-570.
42. Quartuccio L, Valent F, Pasut E, Tascini C, De Vita S. Prevalence of COVID-19 among patients with chronic inflammatory rheumatic diseases treated with biologic agents or small molecules: A population-based study in the first two months of COVID-19 outbreak in Italy. *Joint Bone Spine.* 2020.
43. Conticini E, Bargagli E, Bardelli M, et al. COVID-19 pneumonia in a large cohort of patients treated with biological and targeted synthetic antirheumatic drugs. *Ann Rheum Dis.* 2020.
44. Jovani V, Calabuig I, Peral-Garrido ML, et al. Incidence of severe COVID-19 in a Spanish cohort of 1037 patients with rheumatic diseases treated with biologics and JAK-inhibitors. *Ann Rheum Dis.* 2020.
45. Favalli EG, Ingegnoli F, Cimaz R, Caporali R. What is the true incidence of COVID-19 in patients with rheumatic diseases? *Ann Rheum Dis.* 2020.
46. Monti S, Balduzzi S, Delvino P, et al. Clinical course of COVID-19 in a series of patients with chronic arthritis treated with immunosuppressive targeted therapies. *Ann Rheum Dis.* 2020; 79(5): 667-668.
47. Santos-Moreno P, Chavez-Chavez J, Hernandez-Zambrano SM, et al. Experience of telemedicine use in a big cohort of patients with rheumatoid arthritis during COVID-19 pandemic. *Ann Rheum Dis.* 2020.
48. Michaud K, Wipfler K, Shaw Y, et al. Experiences of Patients With Rheumatic Diseases in the United States During Early Days of the COVID-19 Pandemic. *ACR Open Rheumatol.* 2020; 2(6): 335-343.
49. Favalli EG, Monti S, Ingegnoli F, et al. Incidence of COVID-19 in patients with rheumatic diseases treated with targeted immunosuppressive drugs: what can we learn from observational data? *Arthritis Rheumatol.* 2020.
50. Zhong J, Shen G, Yang H, et al. COVID-19 in patients with rheumatic disease in Hubei province, China: a multicentre retrospective observational study. *Lancet Rheumatol.* 2020.
51. Kasap Cuceoglu M, Batu ED, Bilginer Y, Ozen S. COVID-19 in paediatric rheumatology patients treated with b/tsDMARDs: a cross-sectional patient survey study. *Ann Rheum Dis.* 2020.
52. Mukusheva Z, Assylbekova M, Poddighe D. Management of pediatric rheumatic patients in Kazakhstan during the coronavirus disease 2019 (COVID-19) pandemic. *Rheumatol Int.* 2020; 40(8): 1351-1352.
53. Favalli EG, De Lucia O, Biggioggero M, Del Papa N, Caporali R. Role of antimalarials in COVID-19: observational data from a cohort of rheumatic patients. *Ann Rheum Dis.* 2020.
54. Benucci M, Damiani A, Giannasi G, et al. Serological tests confirm the low incidence of COVID-19 in chronic rheumatic inflammatory diseases treated with biological DMARD. *Ann Rheum Dis.* 2020.
55. Zomalheto Z, Assogba C, Dossou-yovo H. Impact of the severe acute respiratory syndrome coronavirus 2 (SARS-CoV2) infection and disease-2019 (COVID-19) on the quality of life of rheumatoid arthritis patients in Benin. *Egypt Rheumatol.* 2020.
56. Seyahi E, Poyraz BC, Sut N, Akdogan S, Hamuryudan V. The psychological state and changes in the routine of the patients with rheumatic diseases during the coronavirus disease (COVID-19) outbreak in Turkey: a web-based cross-sectional survey. *Rheumatol Int.* 2020; 40(8): 1229-1238.
57. Salvarani C, Bajocchi G, Mancuso P, et al. Susceptibility and severity of COVID-19 in patients treated with bDMARDs and tsDMARDs: a population-based study. *Ann Rheum Dis.* 2020; 79(7): 986-988.
58. Fragoulis GE, Evangelatos G, Arida A, et al. Treatment adherence of patients with systemic rheumatic diseases in COVID-19 pandemic. *Ann Rheum Dis.* 2020.
59. Tomelleri A, Sartorelli S, Campochiaro C, Baldissera EM, Dagna L. Impact of COVID-19 pandemic on patients with large-vessel

vasculitis in Italy: a monocentric survey. *Ann Rheum Dis.* 2020.

60. Macias J, Gonzalez-Moreno P, Sanchez-Garcia E, et al. Similar incidence of Coronavirus Disease 2019 (COVID-19) in patients with rheumatic diseases with and without hydroxychloroquine therapy. *medRxiv.* 2020.

61. Zhang S, Lu X, Cao Y, et al. Concerns about disease management and psychological stress in SAPHO patients during the COVID-19 epidemic. *medRxiv.* 2020.

62. Cavagna L, Bruno R, Zanframundo G, et al. Clinical presentation and evolution of COVID-19 in immunosuppressed patients. Preliminary evaluation in a North Italian cohort on calcineurin-inhibitors based therapy. *medRxiv.* 2020.

63. Emmi G, Bettiol A, Mattioli I, et al. SARS-CoV-2 infection among patients with systemic autoimmune diseases. *Autoimmun Rev.* 2020; 19(7): 102575.

64. Zen M, Fuzzi E, Astorri D, et al. SARS-CoV-2 infection in patients with autoimmune rheumatic diseases in northeast Italy: A cross-sectional study on 916 patients. *J Autoimmun.* 2020; 112: 102502.

65. Fernandez-Gutierrez B, Leon L, Madrid A, et al. Hospital admissions in inflammatory rheumatic diseases during the COVID-19 pandemic: incidence and role of disease modifying agents. *medRxiv.* 2020.

66. Pablos JL, Abasolo L, Alvaro-Gracia JM, et al. Prevalence of hospital PCR-confirmed COVID-19 cases in patients with chronic inflammatory and autoimmune rheumatic diseases. *Ann Rheum Dis.* 2020.

67. D'Silva KM, Serling-Boyd N, Wallwork R, et al. Clinical characteristics and outcomes of patients with coronavirus disease 2019 (COVID-19) and rheumatic disease: a comparative cohort study from a US 'hot spot'. *Ann Rheum Dis.* 2020.

68. Zhao J, Pang R, Wu J, et al. Clinical characteristics and outcomes of patients with COVID-19 and rheumatic disease in China 'hot spot' versus in US 'hot spot': similarities and differences. *Ann Rheum Dis.* 2020.

69. So H, Mak JWY, Tam LS. No Systemic Lupus Erythematosus with COVID-19 in Hong Kong: The Effect of Masking? *J Rheumatol.* 2020.

70. Benoy S, Traksel R, Verhaegh P, Broen J. COVID-19 in rheumatology outpatient clinics: Dutch mirror image to Lombardy, Italy. *Ann Rheum Dis.* 2020.

71. Queiro Silva R, Armesto S, Gonzalez Vela C, Naharro Fernandez C, Gonzalez-Gay MA. COVID-19 patients with psoriasis and psoriatic arthritis on biologic immunosuppressant therapy vs apremilast in North Spain. *Dermatol Ther.* 2020; e13961.

72. Sanchez-Piedra C, Diaz-Torne C, Manero J, et al. Clinical features and outcomes of COVID-19 in patients with rheumatic diseases treated with biological and synthetic targeted therapies. *Ann Rheum Dis.* 2020; 79(7): 988-990.

73. Nuno L, Novella Navarro M, Bonilla G, et al. Clinical course, severity and mortality in a cohort of patients with COVID-19 with rheumatic diseases. *Ann Rheum Dis.* 2020.

74. Gianfrancesco M, Hyrich KL, Al-Adely S, et al. Characteristics associated with hospitalisation for COVID-19 in people with rheumatic disease: data from the COVID-19 Global Rheumatology Alliance physician-reported registry. *Ann Rheum Dis.* 2020; 79(7): 859-866.

75. Brito CA, Paiva JG, Pimentel FN, Guimaraes RS, Moreira MR. COVID-19 in patients with rheumatological diseases treated with anti-TNF. *Ann Rheum Dis.* 2020.

76. Wallace B, Washer L, Marder W, Kahlenberg JM. Patients with lupus with COVID-19: University of Michigan experience. *Ann Rheum Dis.* 2020.

77. Pablos J, Galindo M, Carmona L, et al. Clinical Outcomes of Patients with COVID-19 and Chronic Inflammatory and Autoimmune Rheumatic Diseases: A Multicentric Matched-Cohort Study. *medRxiv.* 2020.

78. Freitas D, Leon L, Mucientes A, et al. Risk factors for hospital admission related to COVID-19 in inflammatory rheumatic diseases. *medRxiv.* 2020.

79. Marques C, Pinheiro MM, Reis Neto ET, et al. COVID-19 in patients with rheumatic diseases: what is the real mortality risk? *Ann Rheum Dis.* 2020.

80. Favalli EG, Agape E, Caporali R. Incidence and Clinical Course of COVID-19 in Patients with Connective Tissue Diseases: A Descriptive Observational Analysis. *J Rheumatol*. 2020; 47(8): 1296.
81. Bozzalla Cassione E, Zanframundo G, Biglia A, et al. COVID-19 infection in a northern-Italian cohort of systemic lupus erythematosus assessed by telemedicine. *Ann Rheum Dis*. 2020.
82. Favalli EG, Gerosa M, Murgio A, Caporali R. Are patients with systemic lupus erythematosus at increased risk for COVID-19? *Ann Rheum Dis*. 2020.
83. Chen C, Yao B, Yan M, et al. The Plight of Patients with Lupus Nephritis during the Outbreak of COVID-19 in Wuhan, China. *J Rheumatol*. 2020.
84. Holubar J, Le Quintrec M, Letaief H, et al. Monitoring of patients with systemic lupus erythematosus during the COVID-19 outbreak. *Ann Rheum Dis*. 2020.
85. Gendebien Z, von Frenckell C, Ribbens C, et al. Systematic analysis of COVID-19 infection and symptoms in a systemic lupus erythematosus population: correlation with disease characteristics, hydroxychloroquine use and immunosuppressive treatments. *Ann Rheum Dis*. 2020.
86. Goyal M, Patil P, Pathak H, et al. Impact of COVID-19 pandemic on patients with SLE: results of a large multicentric survey from India. *Ann Rheum Dis*. 2020.
87. Gartshteyn Y, Askanase A, Schmidt N, et al. COVID-19 and systemic lupus erythematosus: a case series. *Lancet Rheumatol*. 2020; 2(8): E452-E454.
88. Mathian A, Mahevas M, Rohmer J, et al. Clinical course of coronavirus disease 2019 (COVID-19) in a series of 17 patients with systemic lupus erythematosus under long-term treatment with hydroxychloroquine. *Ann Rheum Dis*. 2020; 79(6): 837-839.
89. Avouac J, Airo P, Carlier N, Matucci-Cerinic M, Allanore Y. Severe COVID-19-associated pneumonia in 3 patients with systemic sclerosis treated with rituximab. *Ann Rheum Dis*. 2020.
